# Supplementary material
Source: PubMed Central journal article supplement (PMC2717875)

# Supp. Figure 1

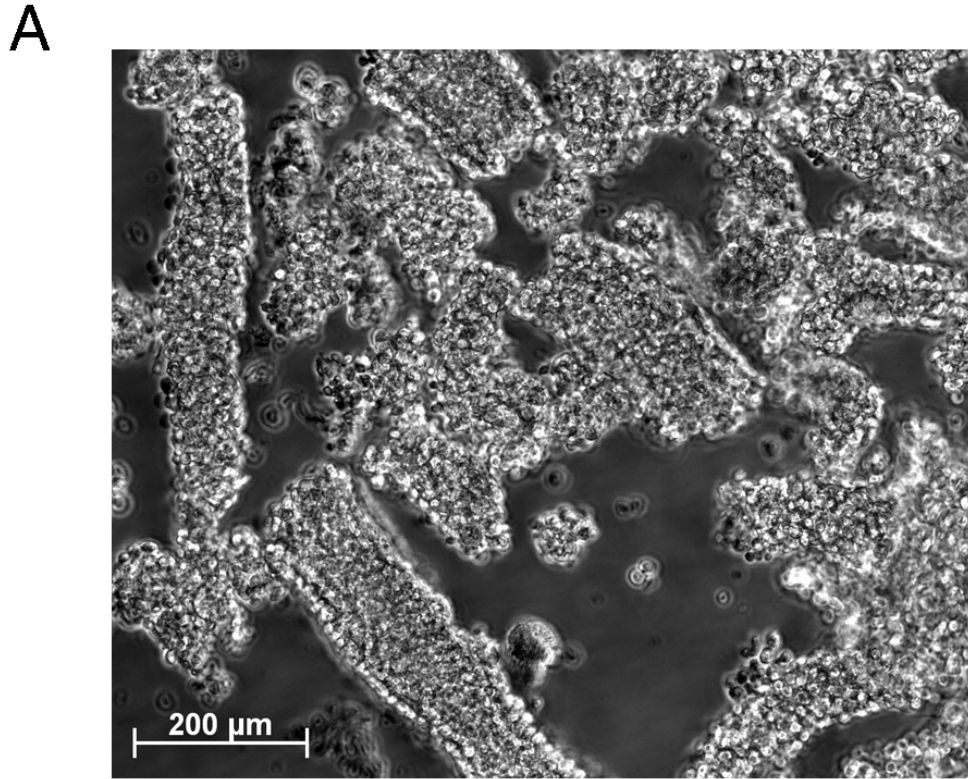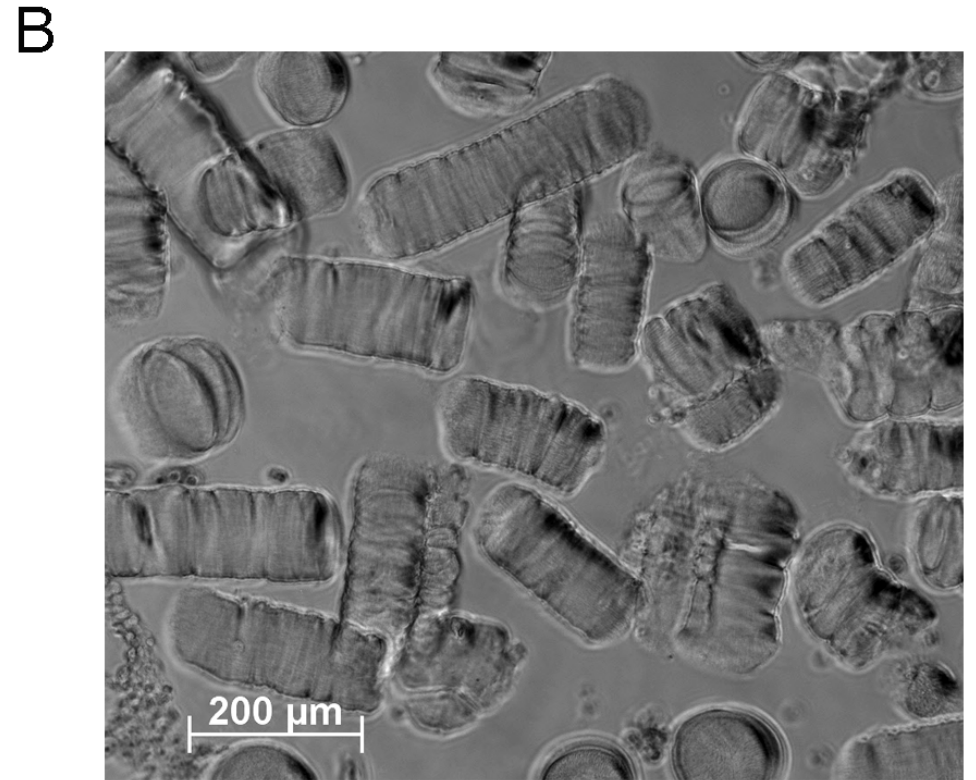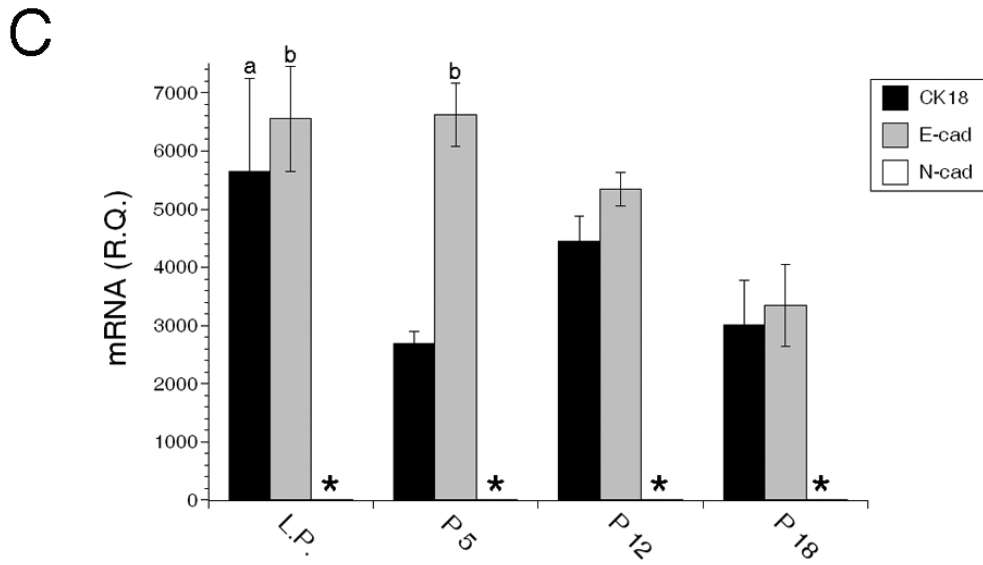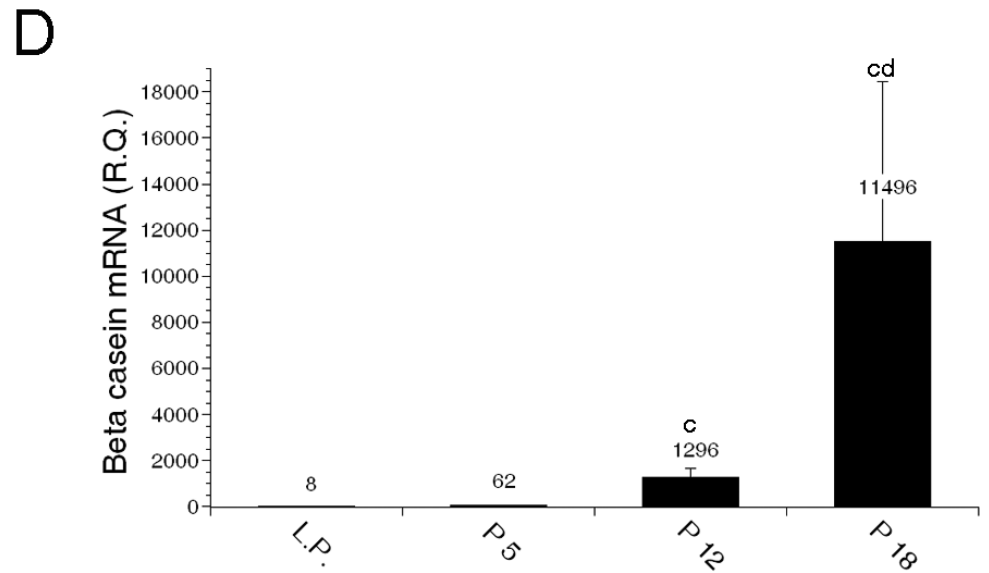

Supplement: en.2008-1473_3.pdf [file en.2008-1473_3.pdf]

## Supp. Figure 2

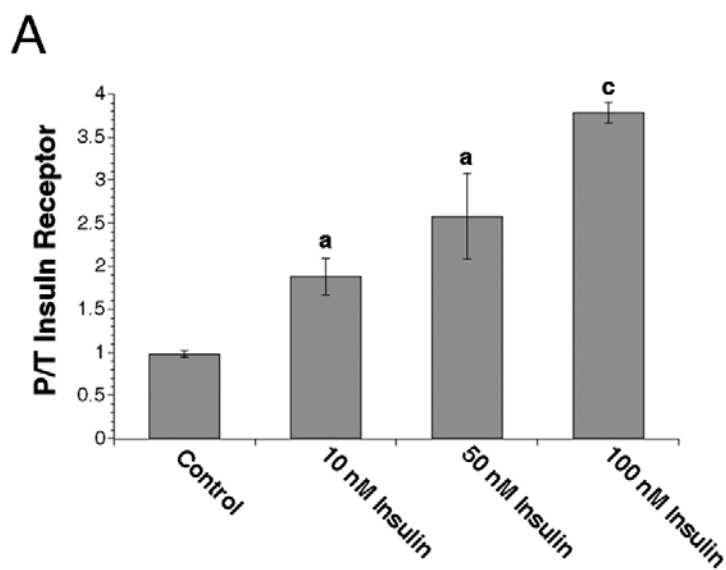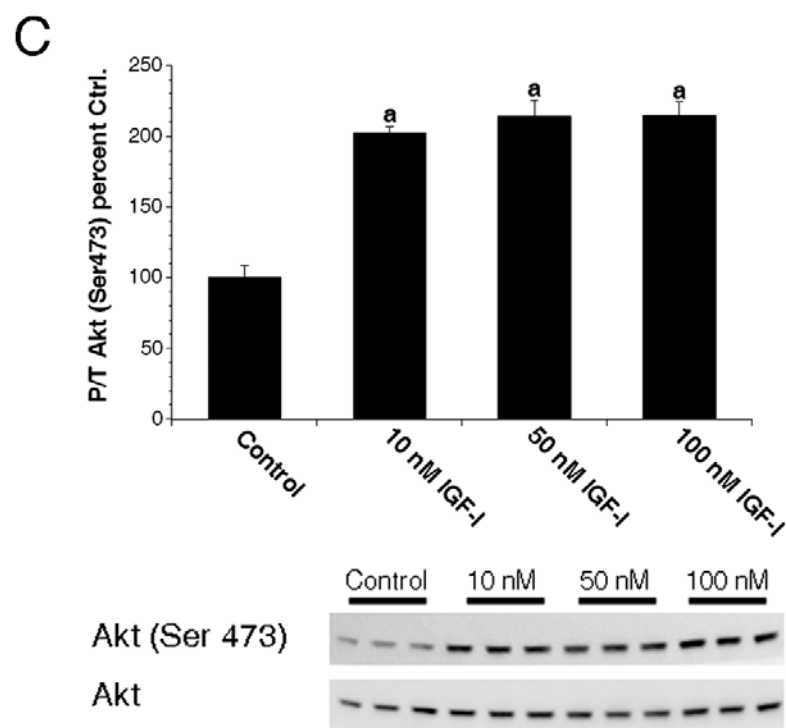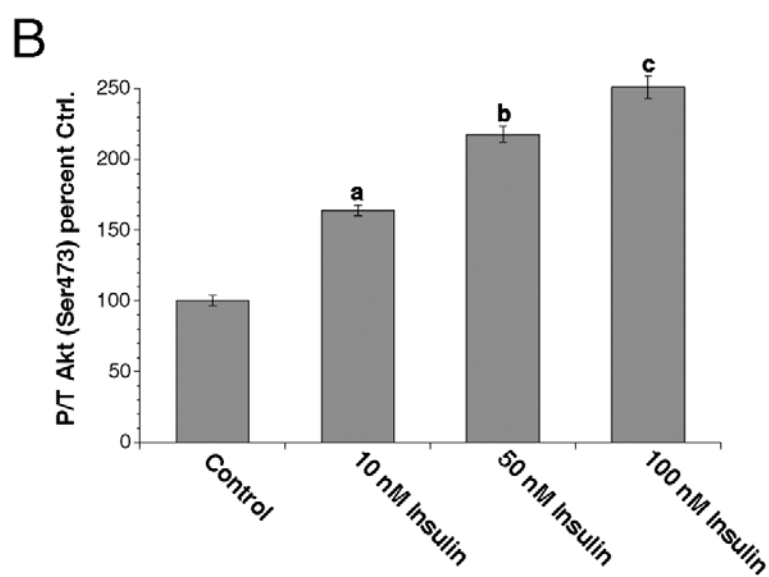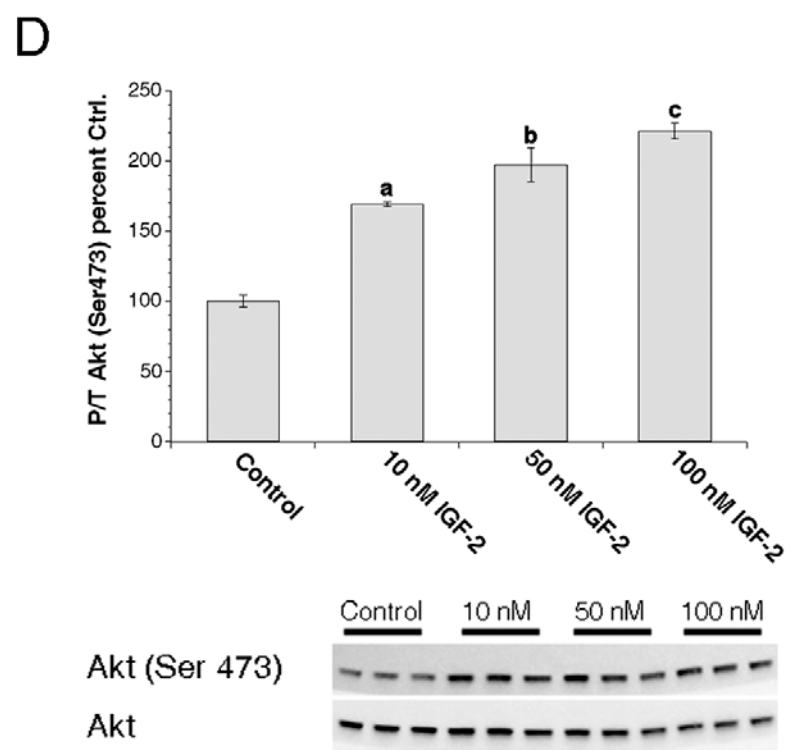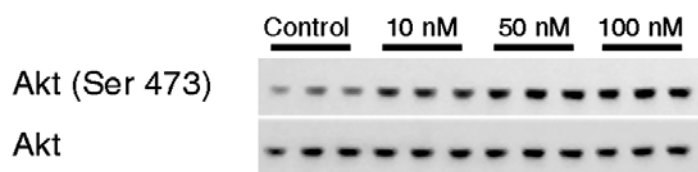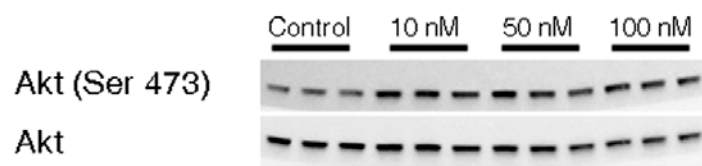

Supplement: en.2008-1473_4.pdf [file en.2008-1473_4.pdf]

Supp. Figure 3

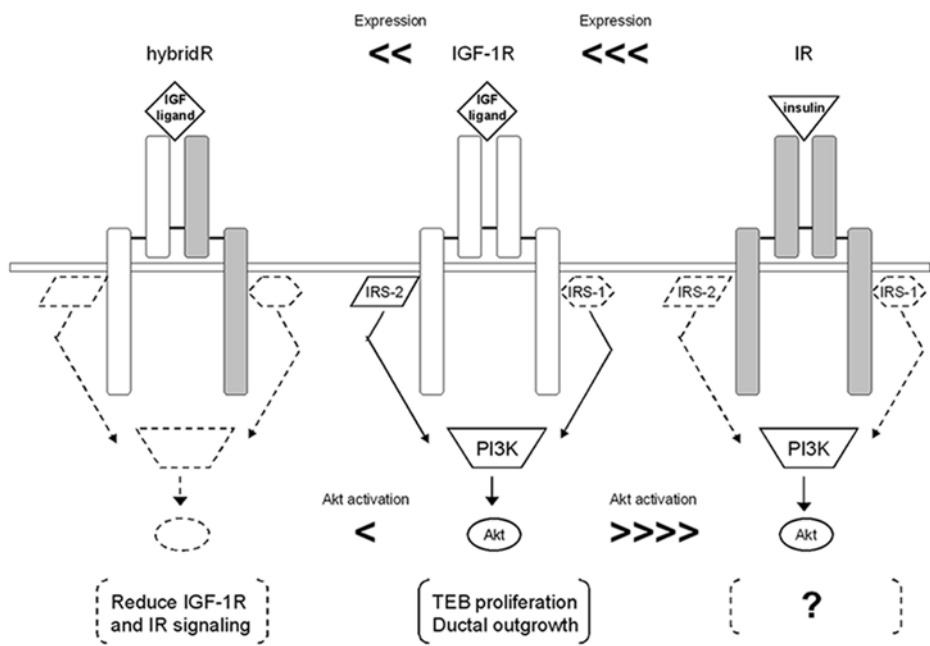

Supplement: en.2008-1473_5.pdf [file en.2008-1473_5.pdf]
